# Supplementary material for: Detection of Salivary miRNAs Reflecting Chronic Periodontitis: A Pilot Study
Source: MDPI journal article supplement (doi:10.3390/molecules24061034), 2019-03-15
Supplement: s1 [file s1]

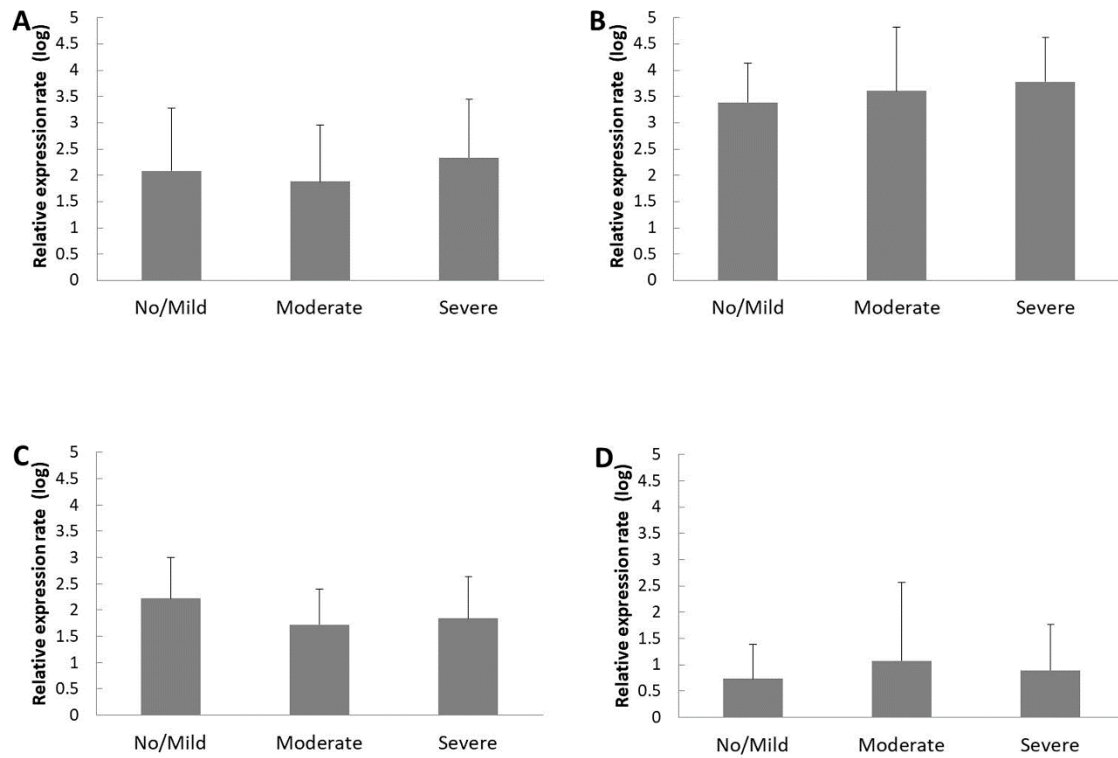

**Figure S2.** Relative expressions of miRNAs (A: hsa-miR-381-3p, B: hsa-miR-543, C: hsa-miR-144-3p, and D: hsa-miR-30b-5p) among three groups using quantitative real-time PCR assays.

One way ANOVA followed by Tukey's method was used.

Bars represent mean  $\pm$  SD of each periodontitis groups.

The relative expressions of miRNAs were normalized by log10 transformation for the analysis.
