# Supplementary material for: Detection of Salivary miRNAs Reflecting Chronic Periodontitis: A Pilot Study
Source: MDPI journal article supplement (doi:10.3390/molecules24061034), 2019-03-15
Supplement: s1 [file s1]

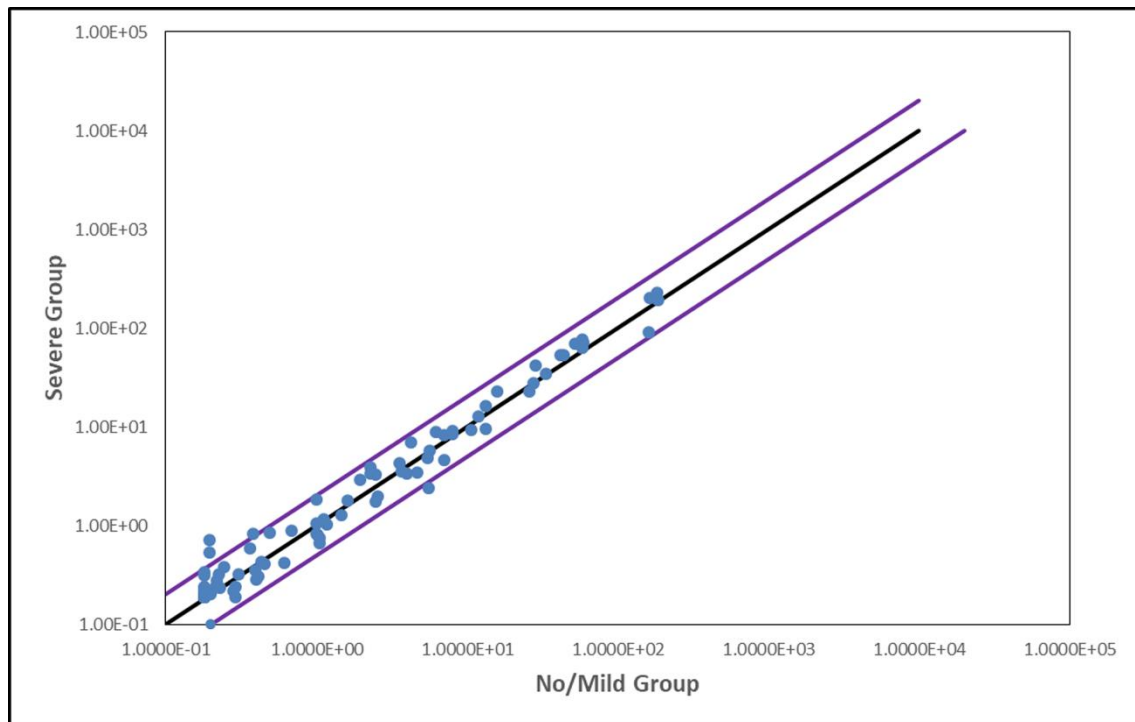

**Figure S1.** Scatterplot of the results of miRNA PCR array analysis.

This plot shows the hybridization signal patterns of miRNAs for the No/Mild and the Severe groups. The expression of miRNAs above the top purple line or below the down purple line shows the difference with fold change  $>2.0$  between the Severe and the No/Mild samples.
