# Supplementary figures and images for: Detection of Salivary miRNAs Reflecting Chronic Periodontitis: A Pilot Study
Source: MDPI journal article supplement (doi:10.3390/molecules24061034), 2019-03-15

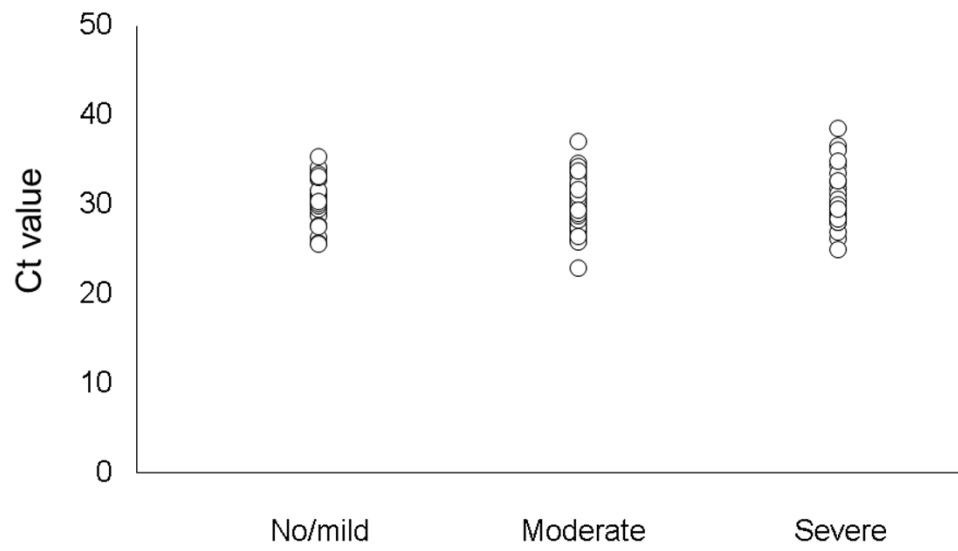

**Figure S3.** Ct values of U6.

Supplement: s1 [file s1]
